# Supplementary material for: A homozygous missense variant of SUMF1 in the Bedouin population extends the clinical spectrum in ultrarare neonatal multiple sulfatase deficiency
Source: PubMed Central journal article supplement (PMC7507568; doi:10.1002/mgg3.1167), 2020-02-12
Supplement: MGG3-8-e1167-s001.pdf [file MGG3-8-e1167-s001.pdf]

## Supplementary Data

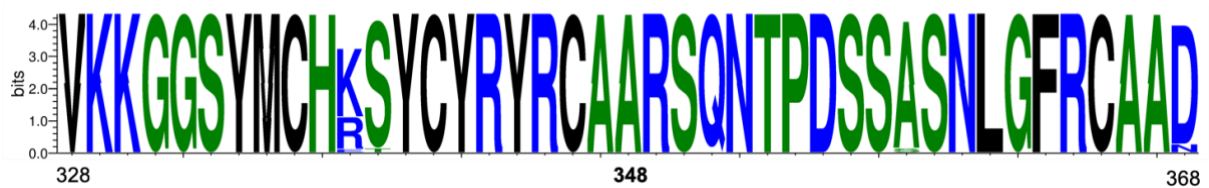

**Fig. S1. Conservation of alanine 348 in FGE**

The sequence logo for the conservation of A348 was generated using the WebLogo 3.0 program. FGE protein sequences (corresponding to residues 328-368 of human FGE) from various higher mammalian species comprising Euarchontoglires, Laurasiatheres and Atlantogenata were aligned using ClustalW and used for analysis. The sequences from 29 species that were used for the logo generation are given in Table S1.

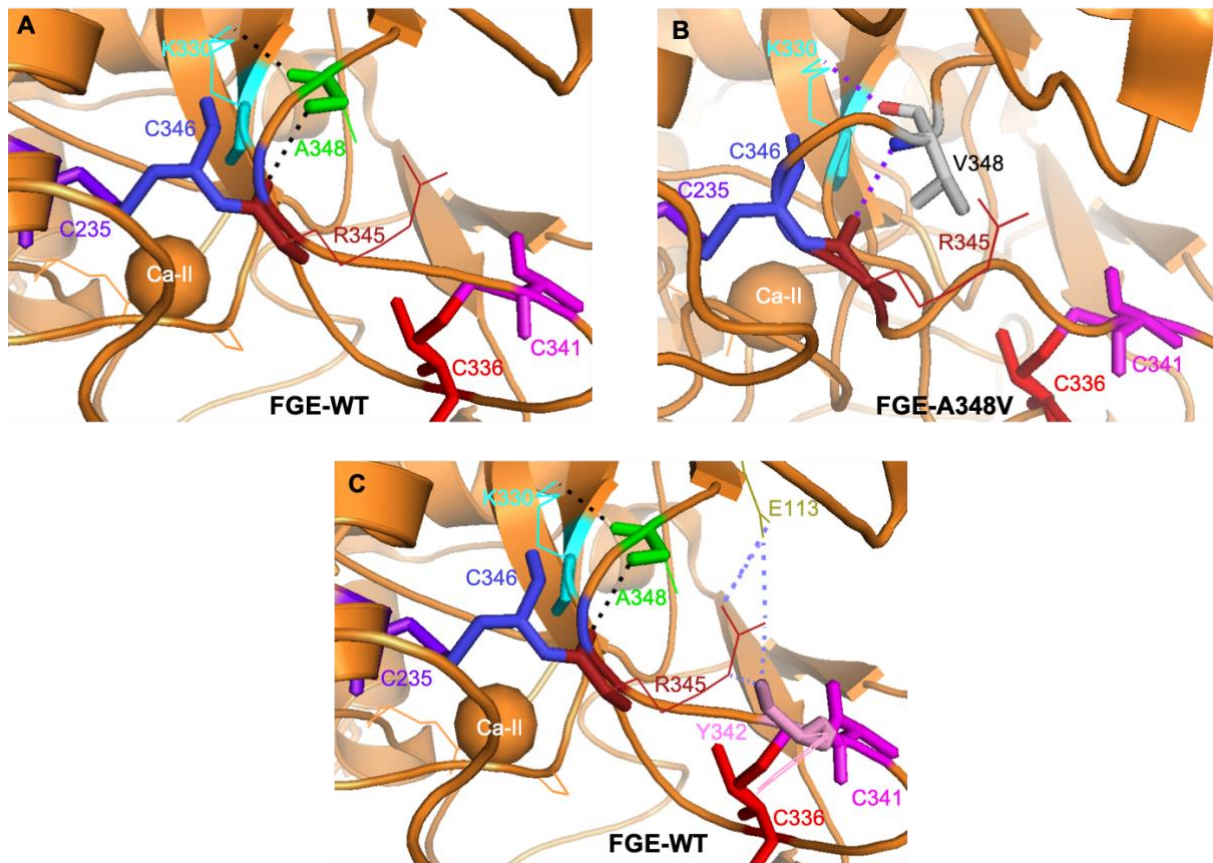

**Fig. S2. Effect of FGE-A348V mutation on FGE structure (*in silico* mutagenesis)**

Based on the X-ray coordinates of human FGE crystal structure (PDB:1Y1E), the polar contacts between residues were analysed and *in-silico* mutagenesis was computed using PyMOL. The residues of interest are highlighted and depicted with main chain as sticks and side chains as lines. The interactions between residues are shown in dotted lines. A) Interactions of residue Alanine-348 (A348), B) mutagenesis of A348 to valine (V348), C) interactions of residue Arginine-345 (R345).

Note that the main chain of A348 is involved in interactions with the main chains of R345 and Lys330 (K330) (Fig. S2A). These interactions were still maintained after exchanging A348 with valine by *in-silico* mutagenesis (Fig. S2B). However, the bulky side chain of the introduced valine showed clashes with the side-chain of R345. The side chain of R345 is involved in interaction with side chain of Glu113 (E113) and divalent interactions with the side chain of Tyr342 (Y342) (Fig. S2C). These crucial interactions of R345 could be disturbed by the clashing side chain of valine affecting, in particular, interactions with Y342 which is a part of the catalytic site and the substrate-binding groove. It can be expected that the A348V substitution imposes a loss of the integrity of the residues that stabilize the structure around the active site.

**Table S1. FGE sequences used for the WebLogo generation in Fig. S1.**

| Species                    | Classification                            | Sequence                                  | No. of sequences |
|----------------------------|-------------------------------------------|-------------------------------------------|------------------|
| Homo sapiens               | Euarchontoglires                          | VKKGGSYMCHRSYCYRYRCAARSQNTPDSSASNLGFRCAAD | 29               |
| Pan troglodytes            |                                           | VKKGGSYMCHRSYCYRYRCAARSQNTPDSSASNLGFRCAAN |                  |
| Pongo abelii               |                                           | VKKGGSYMCHRSYCYRYRCAARSQNTPDSSASNLGFRCAAD |                  |
| Nomascus leucogenys        |                                           | VKKGGSYMCHRSYCYRYRCAARSQNTPDSSASNLGFRCAAD |                  |
| Macaca mulatta             |                                           | VKKGGSYMCHRSYCYRYRCAARSQNTPDSSASNLGFRCAAD |                  |
| Papio anubis               |                                           | VKKGGSYMCHRSYCYRYRCAARSQNTPDSSASNLGFRCAAD |                  |
| Callithrix jacchus         |                                           | VKKGGSYMCHRSYCYRYRCAARSQNTPDSSASNLGFRCAAD |                  |
| Carlito syrichta           |                                           | VKKGGSYMCHRSYCYRYRCAARSQNTPDSSASNLGFRCAAD |                  |
| Otolemur garnettii         |                                           | VKKGGSYMCHRSYCYRYRCAARSQNTPDSSASNLGFRCAAD |                  |
| Tupaia chinensis           |                                           | VKKGGSYMCHKSYCYRYRCAARSQNTPDSSASNLGFRCAAD |                  |
| Mus musculus               |                                           | VKKGGSYMCHKSYCYRYRCAARSQNTPDSSASNLGFRCAAD |                  |
| Rattus norvegicus          |                                           | VKKGGSYMCHKSYCYRYRCAARSQNTPDSSASNLGFRCAAD |                  |
| Ictidomys tridecemlineatus |                                           | VKKGGSYMCHKTYCYRYRCAARSQNTPDSSASNLGFRCAAD |                  |
| Dipodomys ordii            |                                           | VKKGGSYMCHKSYCYRYRCAARSQNTPDSSASNLGFRCAAD |                  |
| Oryctolagus cuniculus      |                                           | VKKGGSYMCHKSYCYRYRCAARSQNTPDSSASNLGFRCAAD |                  |
| Ochotona princeps          |                                           | VKKGGSYMCHKSYCYRYRCAARSQNTPDSSASNLGFRCAAD |                  |
| Canis lupus familiaris     | Laurasiatheres                            | VKKGGSYMCHKSYCYRYRCAARSQNTPDSSASNLGFRCAAD |                  |
| Felis catus                |                                           | VKKGGSYMCHKSYCYRYRCAARSQNTPDSSASNLGFRCAAD |                  |
| Ursus maritimus            |                                           | VKKGGSYMCHKSYCYRYRCAARSQNTPDSSASNLGFRCAAD |                  |
| Ailuropoda melanoleuca     |                                           | VKKGGSYMCHKSYCYRYRCAARSQNTPDSSASNLGFRCAAD |                  |
| Pteropus vampyrus          |                                           | VKKGGSYMCHESYCYRYRCAARSQNTPDSSASNLGFRCAAD |                  |
| Sus scrofa                 |                                           | VKKGGSYMCHKSYCYRYRCAARSQNTPDSSASNLGFRCAAD |                  |
| Equus caballus             |                                           | VKKGGSYMCHKSYCYRYRCAARSQNTPDSSASNLGFRCAAD |                  |
| Bos taurus                 |                                           | VKKGGSYMCHKSYCYRYRCAARSQNTPDSSASNLGFRCAAD |                  |
| Capra hircus               |                                           | VKKGGSYMCHKSYCYRYRCAARSQNTPDSSASNLGFRCAAD |                  |
| Ovis aries                 |                                           | VKKGGSYMCHKSYCYRYRCAARSQNTPDSSASNLGFRCAAD |                  |
| Erinaceus europaeus        | VKKGGSYMCHKSYCYRYRCAARSQNTPDSSASNLGFRCAAD |                                           |                  |
| Loxodonta africana         | Atlantogenata                             | VKKGGSYMCHKSYCYRYRCAARSQNTPDSSASNLGFRCAAD |                  |
| Dasybus novemcinctus       |                                           | VKKGGSYMCHKSYCYRYRCAARSQNTPDSSASNLGFRCAAN |                  |
